# Supplementary material for: Altered Distribution of Circulating T Follicular Helper-Like Cell Subsets in Rheumatoid Arthritis Patients
Source: PubMed Central journal article supplement (PMC8326448; doi:10.3389/fmed.2021.690100), 2021-07-19
Supplement: Image_1.pdf [file Image_1.pdf]

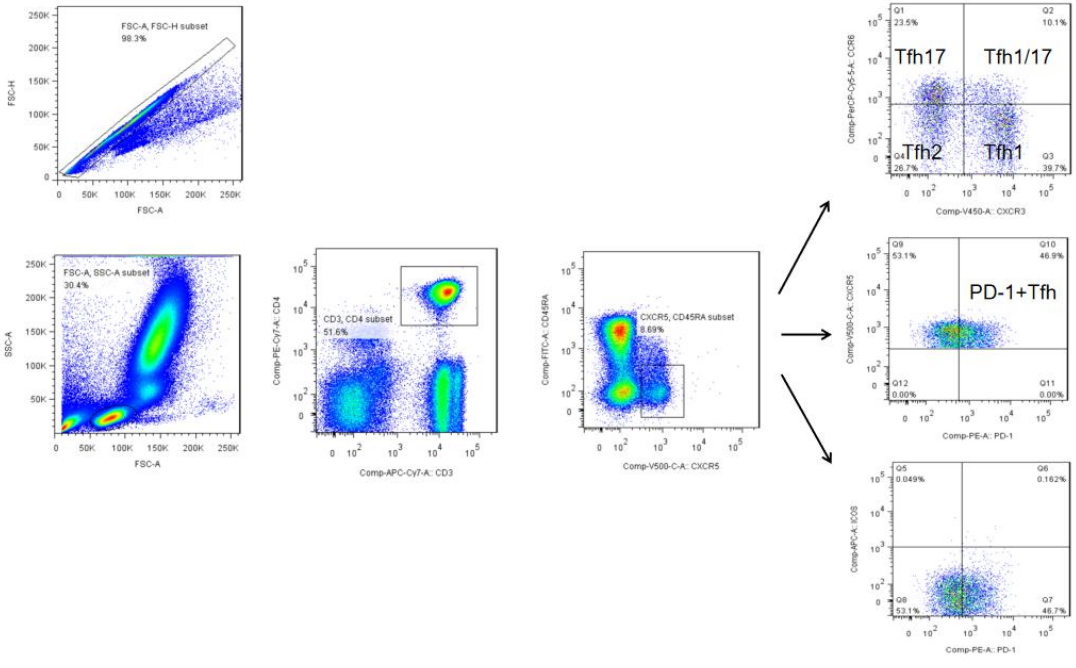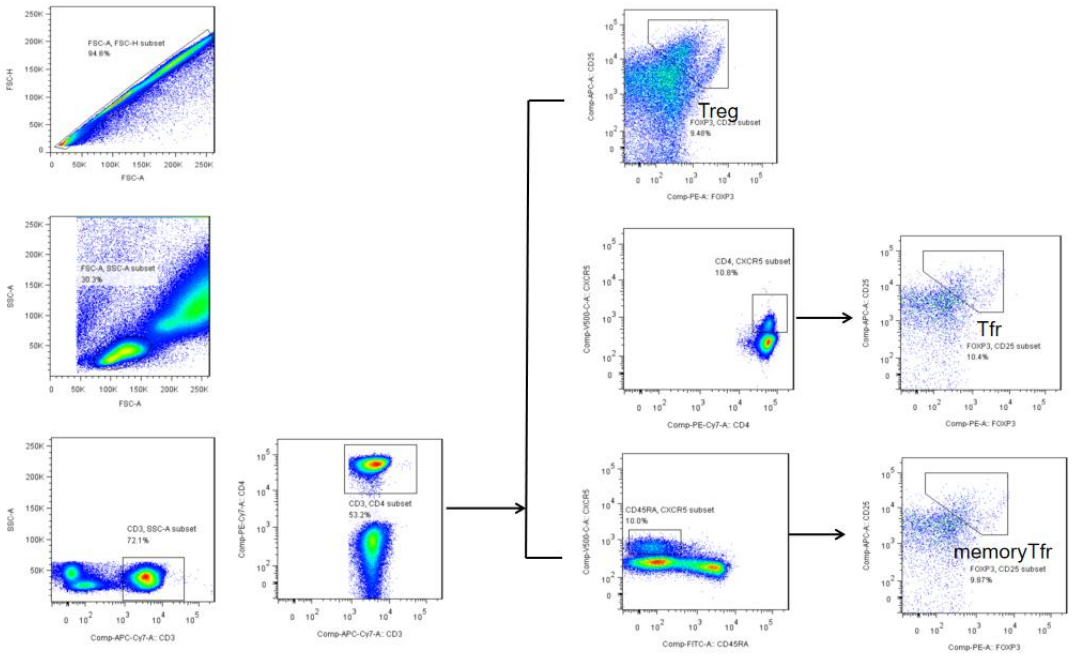

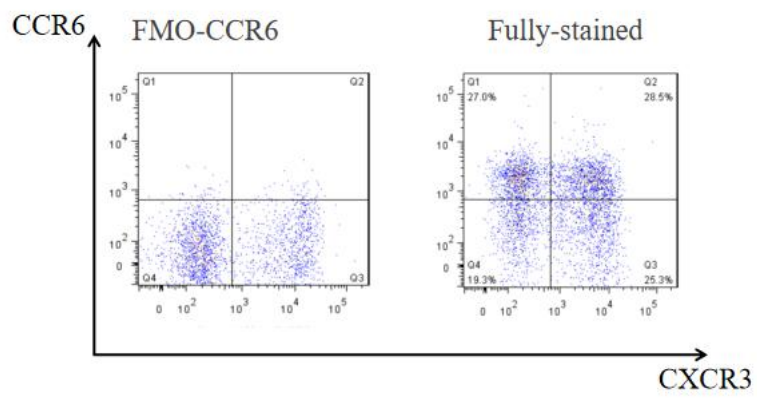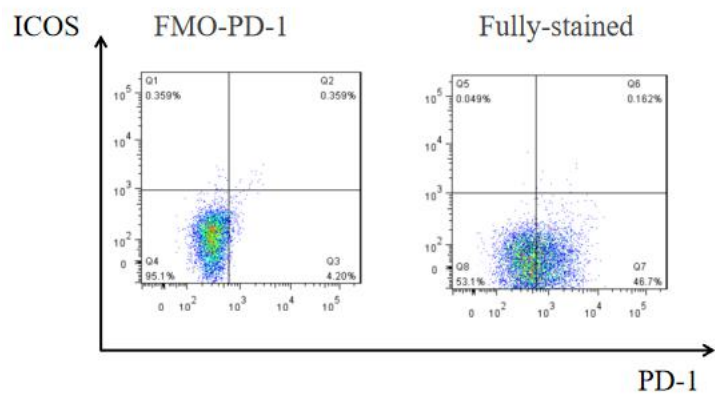

Supplementary figures. Complete, detailed gating strategy and the FMO of CCR6 and PD-1.
